# Supplementary material
Source: Springer Nature journal article supplement (https://www.springermedizin.de/resource/supplementary/12891_2011_1463_MOESM2_ESM.pdf/9508360)

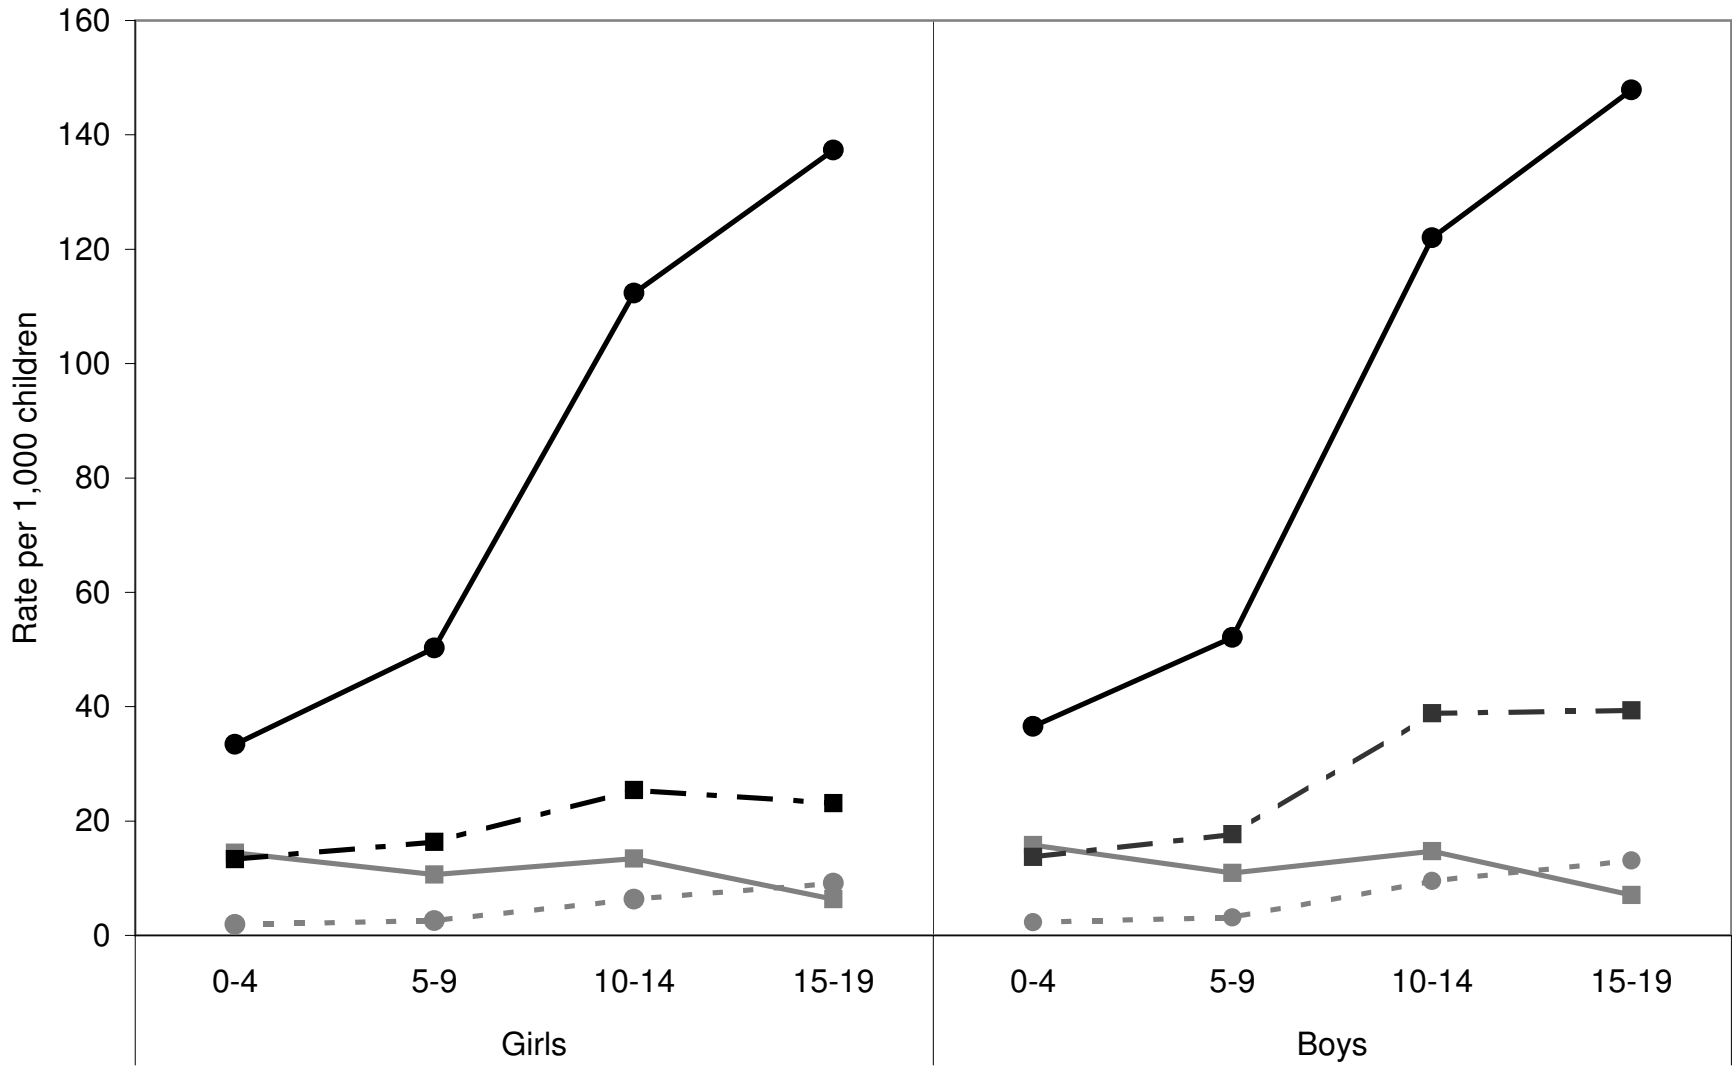

Primary Care
  Pediatrics
  Medical specialists
  Surgical specialists

Supplement: MOESM2 [file 9508360]
